# Supplementary material for: 19F NMR spectroscopy monitors ligand binding to recombinantly fluorine-labelled b′x from human protein disulphide isomerase (hPDI)
Source: PubMed Central journal article supplement (PMC4157668; doi:10.1039/c4ob00699b), 2014-05-06

## Electronic Supplementary Information (ESI)

### GROWTH AND PURIFICATION PROTOCOL

Human PDI **b'**x (K213-P351) was recombinantly expressed from a pET23 vector with an N-terminal MHHHHHMM tag in *E.coli* BL21 (DE3) pLysS. Cells were grown using standard minimal media to enable incorporation of single nitrogen or carbon sources for structural biology. These sources ( $U\text{-}^{13}\text{C}$ -glucose or  $^{15}\text{N}$  ammonium sulphate) can be added in addition to fluorination if required. Cells were grown aseptically until an  $A_{600}$  of 0.5-0.6 then the fluoroindole of choice (5- or 6-) was added from a 200x stock in DMSO to a final concentration of 60 mg/L of culture. The cells were incubated for a further 15 minutes and then induced with IPTG for 3 hours before harvest. Protein extraction and purification followed standard protocols; human **b'**x was released from the cells by freeze-thaw commensurate to the pLysS host used. Human **b'**x was purified using nickel affinity chromatography followed by ion exchange (Source 30Q) and a final purification step of size exclusion using a Superdex 200.

**ESI Figure 1.** Amino acid sequence of human PDI **b'**x with the position of Trp 347 highlighted. The locations of secondary structure elements are depicted by blue rectangles and pink arrows above the sequence representing helices and strands respectively.

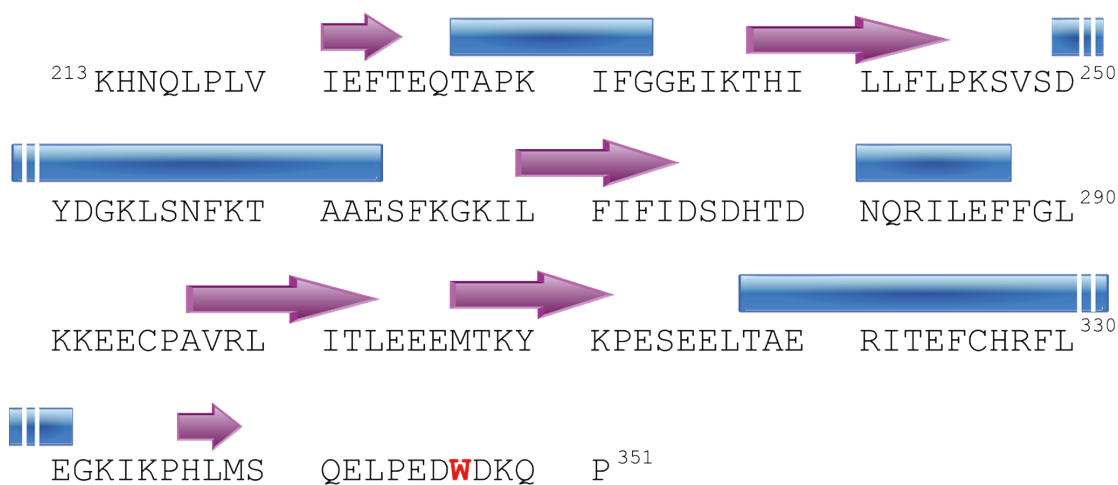

**ESI Figure 2.** Deconvoluted Bruker MicroTOF-Q Mass spectrometry data from recombinant **b'x** samples obtained from minimal media preparations with no indole supplement (a), indole added (b), 5-fluoroindole added (c) and 6-fluoroindole added (d).

Wild-type human PDI **b'x** (K213-P351 + MH<sub>6</sub>M) is 17282.8 Da.

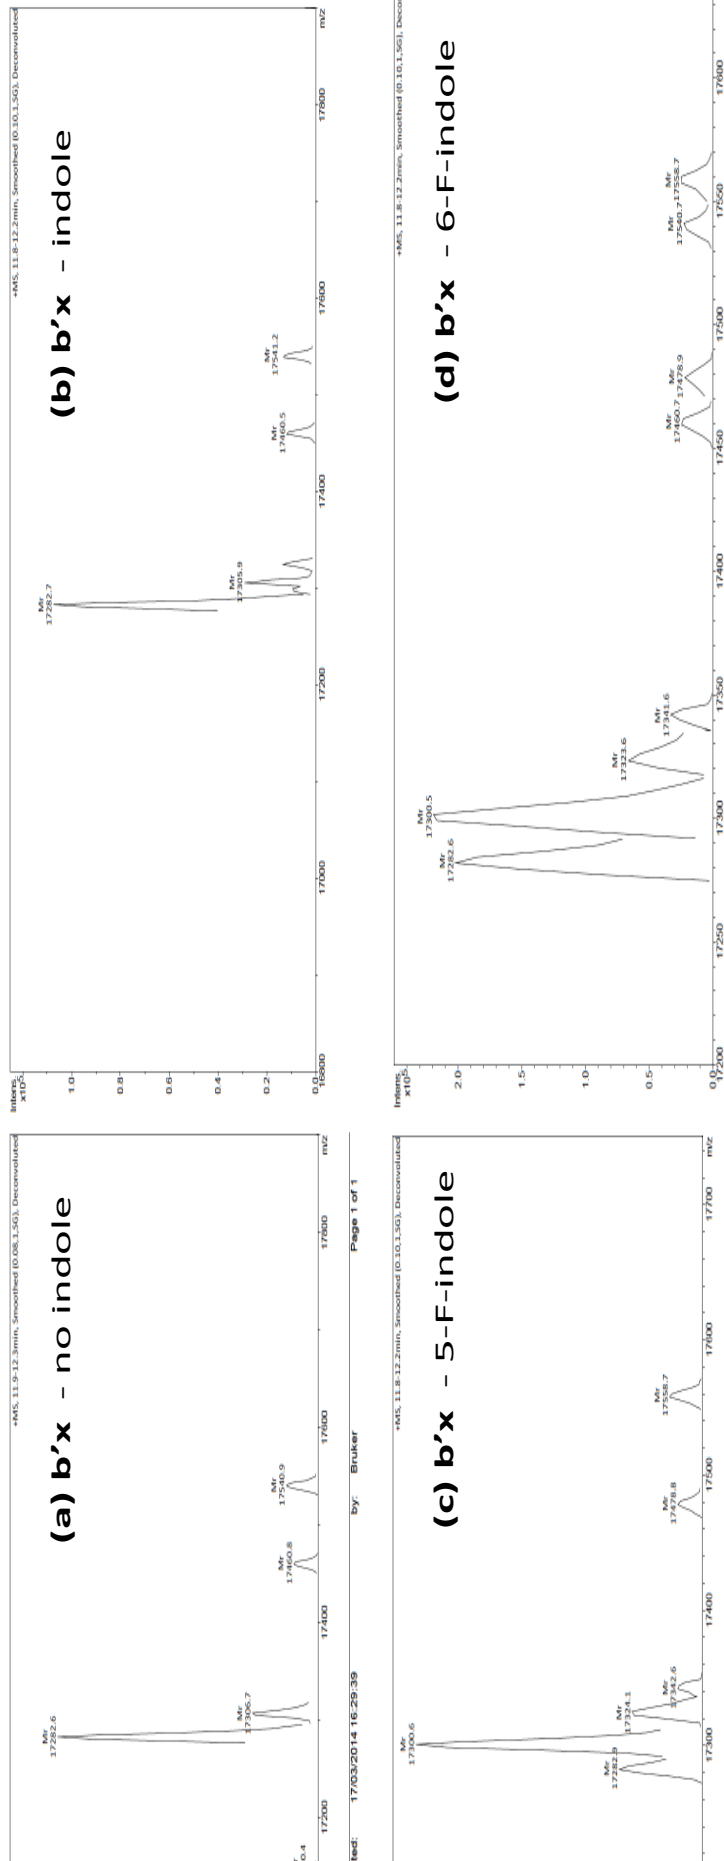

Data from ESI Figure 2(a) and 2(b) correlate with the expected mass

ESI Figure 2(c) has a major MS peak of 17300.6 Da (+18 Da) and a minor peak of 17282.9 Da confirming some protein has not incorporated 5-F-indole. However, the relative ratios suggest incorporation is > 80%.

ESI Figure 2(d) shows two MS peaks +18 Da apart that are comparable to those observed in ESI 2(c) but here 6-F-indole incorporation is around 55%.

**ESI Figure 3(a).** 6-F-Trp interactions modelled using the **b'x** I272A mutant structure (3bj5.pdb).

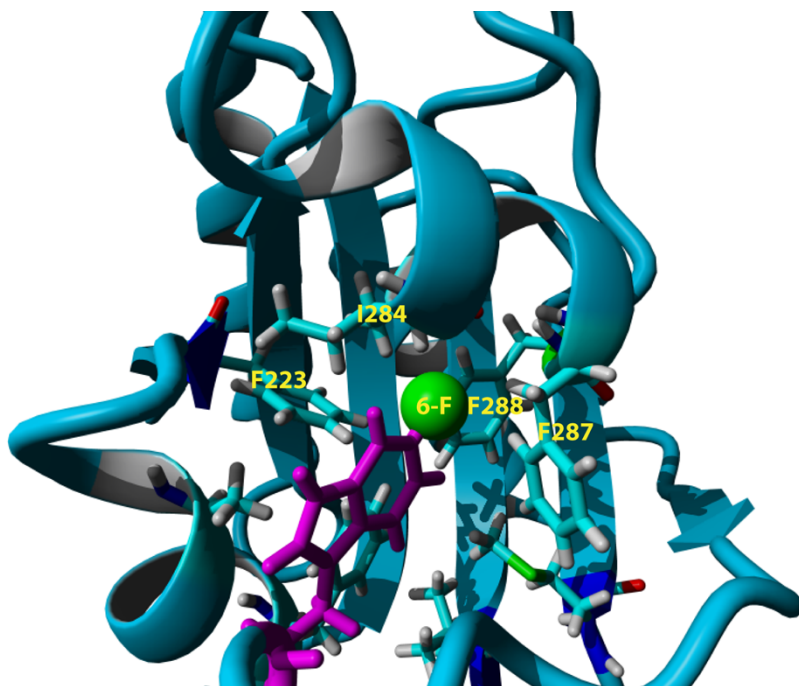

**ESI Figure 3(b).** 5-F-Trp interactions modelled using the **b'x** I272A mutant structure (3bj5.pdb) with a view from below the structure as shown in Figures 1 and 2.

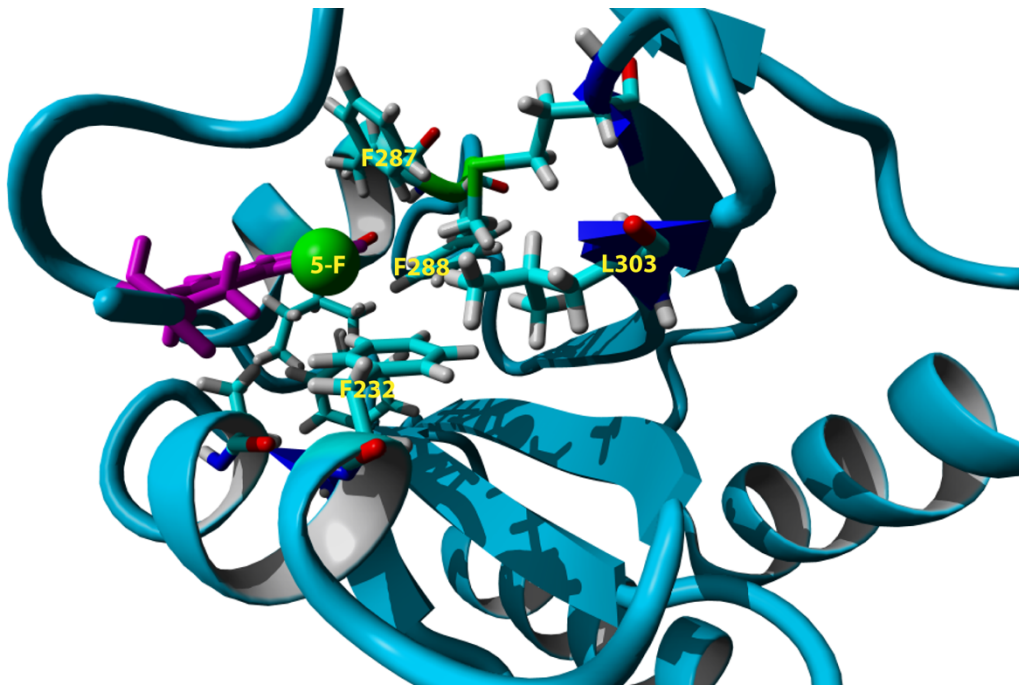

**Figure 4**  $^1\text{H},^{15}\text{N}$ -HSQC minimal chemical shift map between wild-type **b'x** and **5-F-Trp-b'x** (a). Chemical shifts  $> (x + \sigma)$  are highlighted in red on the crystal structure (b) with x-linker and the binding site coloured as shown Figure 1. Trp 347 is highlighted in (a) by the red triangles.

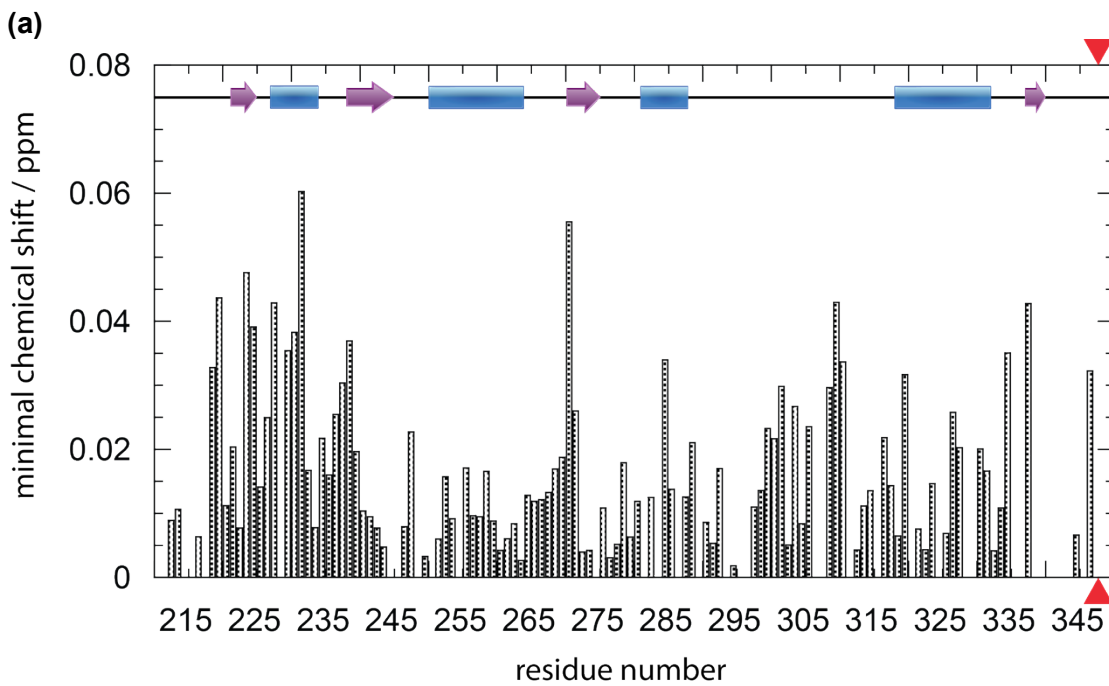

(b)

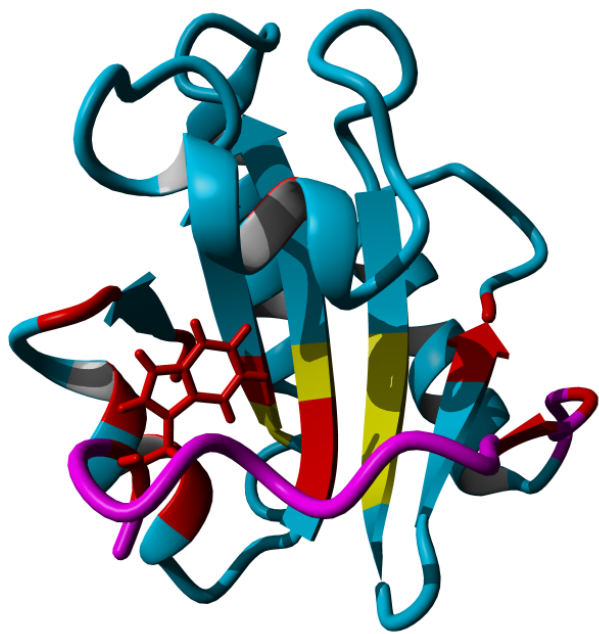

Supplement: OB-012-C4OB00699B-s001.pdf [file OB-012-C4OB00699B-s001.pdf]
